# Supplementary material for: Photocytotoxicity and photoinduced phosphine ligand exchange in a Ru(ii) polypyridyl complex
Source: Royal Society of Chemistry journal article supplement (doi:10.1039/d1sc05647f), 2022-01-01
Supplement: d1sc05647f1.pdf [file d1sc05647f1.pdf]

## Supporting Information

# Photocytotoxicity and Photoinduced Phosphine Ligand Exchange in a Ru(II) Polypyridyl Complex

Sean J. Steinke,<sup>‡</sup> Sayak Gupta,<sup>†</sup> Eric J. Piechota,<sup>‡</sup> Curtis E. Moore,<sup>‡</sup> Jeremy J. Kodanko,<sup>†\*</sup>  
and Claudia Turro<sup>‡\*</sup>

<sup>‡</sup>*Department of Chemistry and Biochemistry, The Ohio State University, Columbus, OH 43210*

<sup>†</sup>*Department of Chemistry, Wayne State University, Detroit, MI 48208*

\*Corresponding Authors: turro.1@osu.edu; jkodanko@wayne.edu

| <b>Table of Contents</b>                                                                                              | <b>Page Number</b> |
|-----------------------------------------------------------------------------------------------------------------------|--------------------|
| <b>In-process and Final <sup>1</sup>H and <sup>31</sup>P{H} NMR Spectra</b> .....                                     | S3                 |
| <b>Figure S1.</b> <sup>1</sup> H NMR Spectrum of [Ru(phen) <sub>2</sub> (PPh <sub>3</sub> )Cl] <sup>+</sup> .....     | S3                 |
| <b>Figure S2.</b> <sup>31</sup> P{H} NMR Spectrum of [Ru(phen) <sub>2</sub> (PPh <sub>3</sub> )Cl] <sup>+</sup> ..... | S3                 |
| <b>Figure S3.</b> <sup>1</sup> H NMR Spectrum of <b>1a</b> .....                                                      | S4                 |
| <b>Figure S4.</b> <sup>31</sup> P{H} NMR Spectrum of <b>1a</b> .....                                                  | S4                 |
| <b>Figure S5.</b> <sup>1</sup> H NMR Spectrum of [Ru(p-cymene)(phen)Cl]Cl .....                                       | S5                 |
| <b>Figure S6.</b> <sup>1</sup> H NMR Spectrum of [Ru(biq)(phen)(PPh <sub>3</sub> )Cl] <sup>+</sup> .....              | S5                 |
| <b>Figure S7.</b> <sup>31</sup> P{H} NMR Spectrum of [Ru(biq)(phen)(PPh <sub>3</sub> )Cl] <sup>+</sup> .....          | S6                 |
| <b>Figure S8.</b> <sup>1</sup> H NMR Spectrum of <b>2a</b> .....                                                      | S6                 |
| <b>Figure S9.</b> <sup>31</sup> P{H} NMR Spectrum of <b>2a</b> .....                                                  | S7                 |
| <b>Figure S10.</b> Circular Voltammograms of <b>1a</b> and <b>2a</b> .....                                            | S7                 |
| <b>Figure S11.</b> <sup>31</sup> P{H} NMR Spectrum of OPPh <sub>3</sub> .....                                         | S8                 |

|                                                                                                                                          |     |
|------------------------------------------------------------------------------------------------------------------------------------------|-----|
| <b>Identification of Photolysis Intermediate I</b> .....                                                                                 | S8  |
| <b>Figure S12.</b> ORTEP plot of intermediate species <b>I</b> .....                                                                     | S8  |
| <b>Table S1.</b> Crystallographic data for intermediate species <b>I</b> .....                                                           | S9  |
| <b>Spectral Deconvolution and Kinetic Analysis</b> .....                                                                                 | S10 |
| <b>Figure S13.</b> Absorption Spectra of <b>2a</b> and Photoproducts in Pyridine .....                                                   | S11 |
| <b>Table S2.</b> Spectra Data for Photolysis of <b>2a</b> in Pyridine .....                                                              | S12 |
| <b>Figure S14.</b> <sup>31</sup> P{H} NMR Spectrum of <b>1a</b> as a function of irradiation.....                                        | S13 |
| <b>Table S3.</b> Crystallographic data for <b>1a</b> , <b>2a</b> , and <b>2b</b> .....                                                   | S14 |
| <b>Table S4.</b> Crystallographic and <sup>1</sup> GS calculated bond lengths and angles for <b>1a</b> , <b>2a</b> , and <b>2b</b> ..... | S15 |
| <b>Figure S15.</b> Electronic density plots of <b>1a</b> HOMO and LUMO .....                                                             | S16 |
| <b>Figure S16.</b> Electronic density plots of <b>2a</b> HOMO and LUMO .....                                                             | S16 |
| <b>Table S5.</b> Composition of Calculated HOMO and LUMO in <b>1a</b> and <b>2a</b> .....                                                | S16 |
| <b>Cell Viability</b> .....                                                                                                              | S17 |
| <b>Figure S17.</b> EC <sub>50</sub> curves of <b>1a</b> .....                                                                            | S17 |
| <b>Figure S18.</b> EC <sub>50</sub> curves of <b>2a</b> .....                                                                            | S18 |
| <b>Figure S19.</b> Viability of MDA-MB-231 cells treated with PPh <sub>3</sub> .....                                                     | S19 |

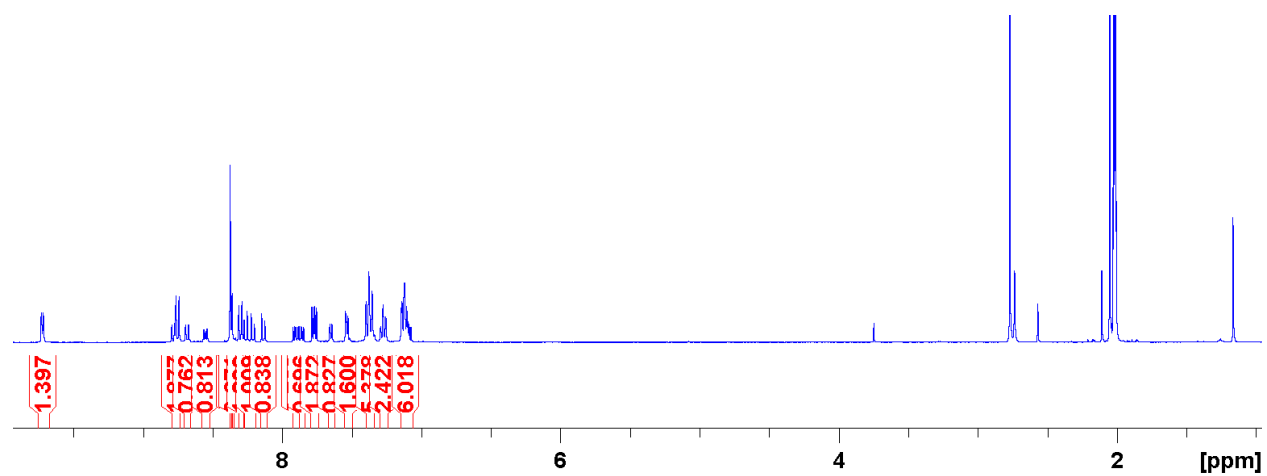

**Figure S1.**  $^1\text{H}$  NMR spectrum of  $[\text{Ru}(\text{phen})_2(\text{PPh}_3)\text{Cl}]^+$  in  $(\text{CD}_3)_2\text{CO}$ .

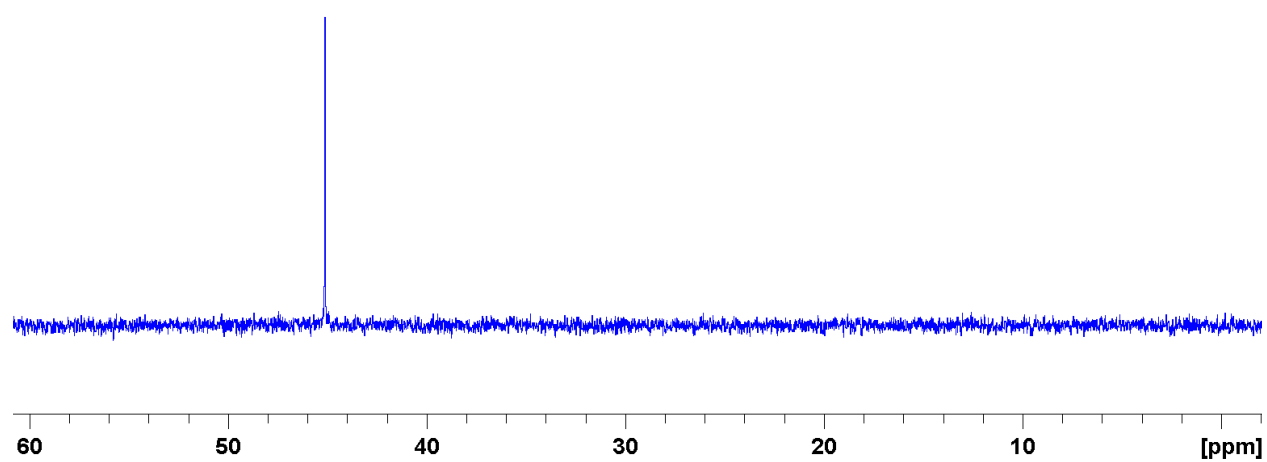

**Figure S2.**  $^{31}\text{P}\{\text{H}\}$  NMR spectrum of  $[\text{Ru}(\text{phen})_2(\text{PPh}_3)\text{Cl}]^+$  in  $(\text{CD}_3)_2\text{CO}$ .

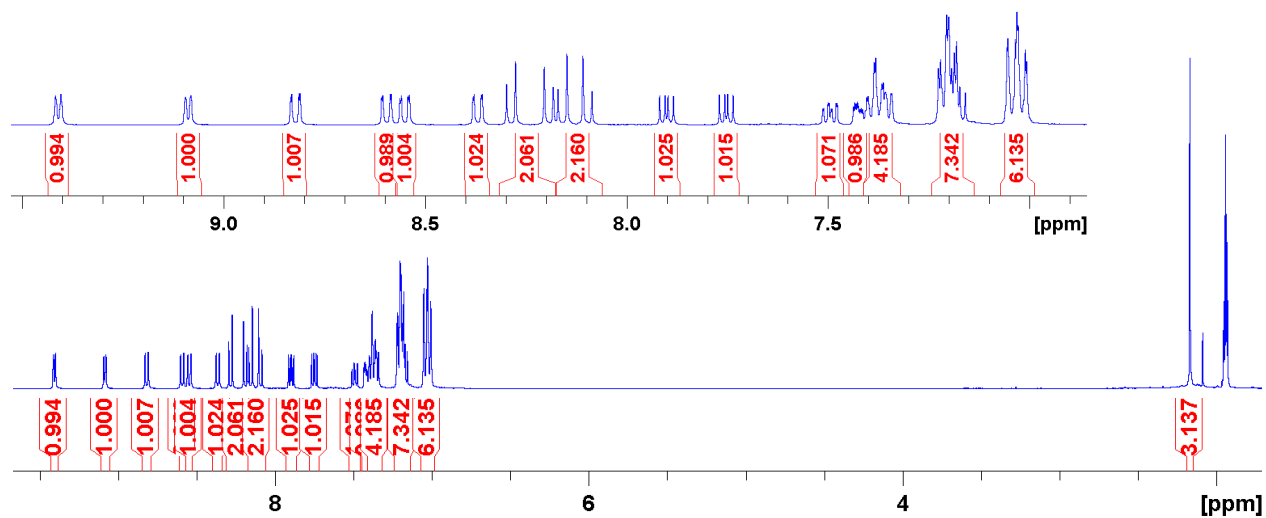

**Figure S3.**  $^1\text{H}$  NMR of **1a** in  $\text{CD}_3\text{CN}$ .

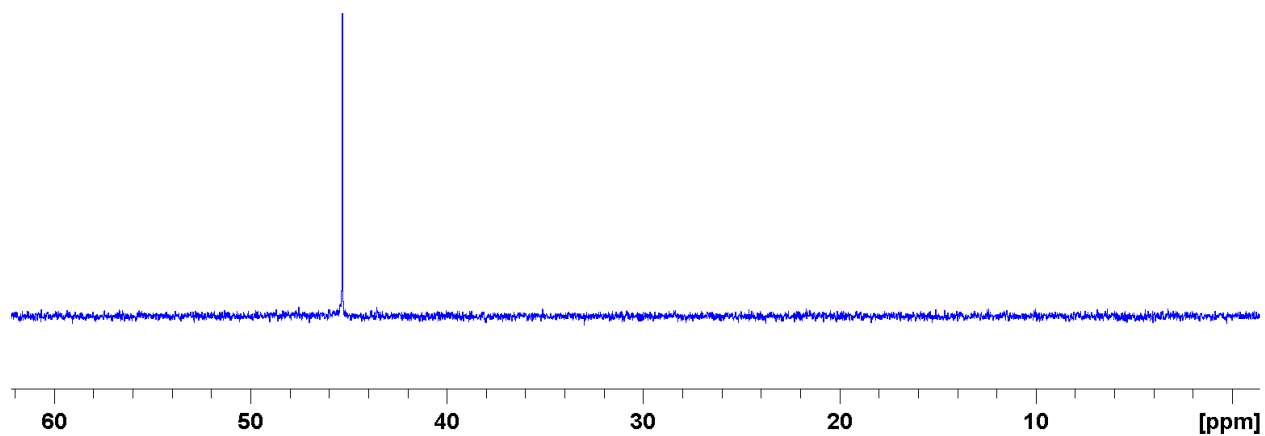

**Figure S4.**  $^{31}\text{P}\{\text{H}\}$  NMR of **1a** in  $\text{CD}_3\text{CN}$ .

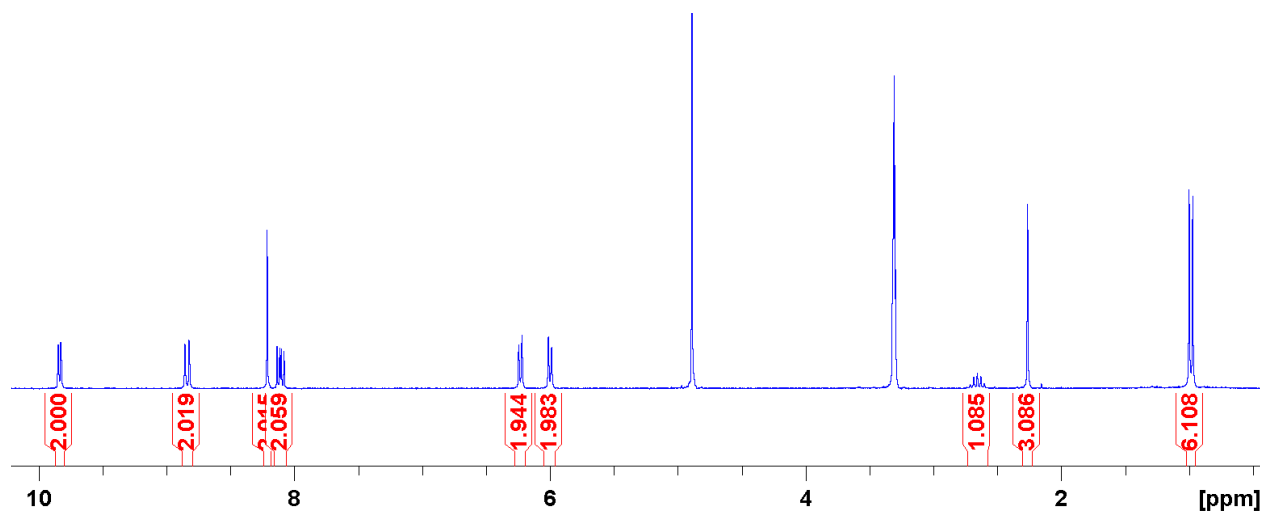

**Figure S5.**  $^1\text{H}$  NMR of  $[\text{Ru}(\text{p-cymene})(\text{phen})\text{Cl}]\text{Cl}$  in  $\text{CD}_3\text{OD}$ .

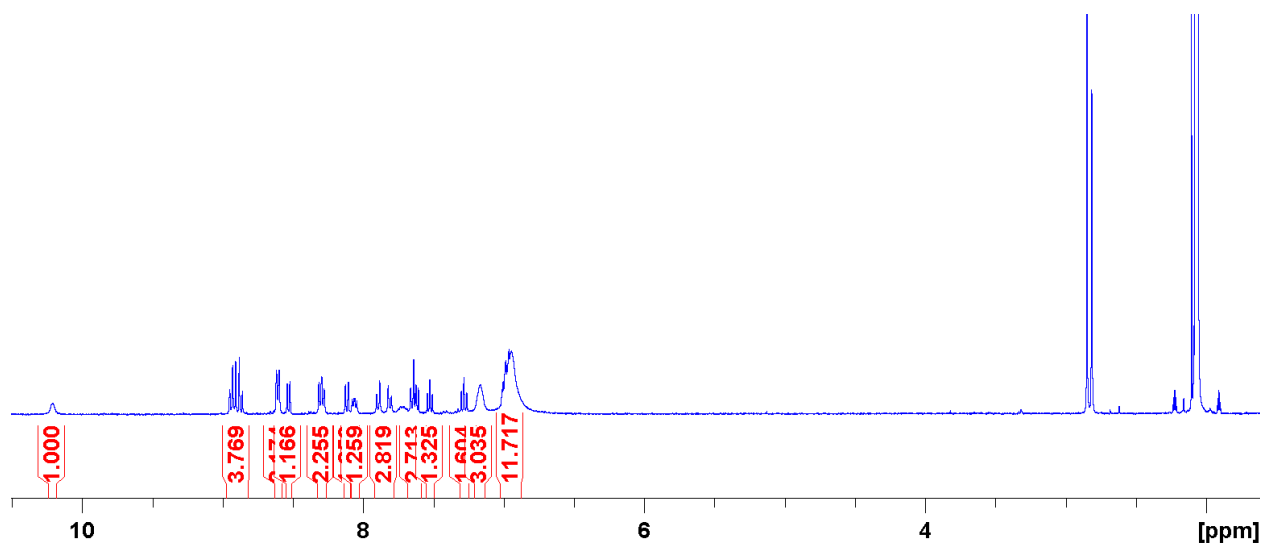

**Figure S6.**  $^1\text{H}$  NMR spectrum of  $[\text{Ru}(\text{biq})(\text{phen})(\text{PPh}_3)\text{Cl}]^+$  in  $(\text{CD}_3)_2\text{CO}$ .

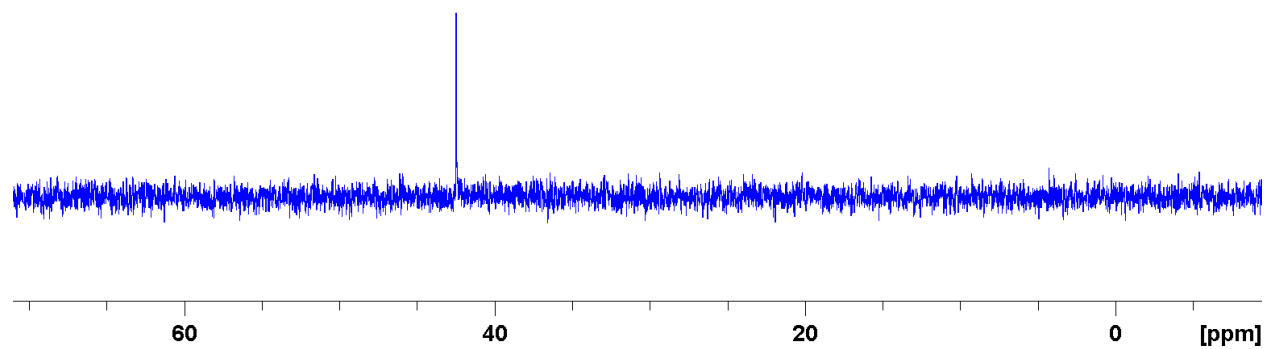

**Figure S7.**  $^{31}\text{P}\{\text{H}\}$  NMR spectrum of  $[\text{Ru}(\text{biq})(\text{phen})(\text{PPh}_3)\text{Cl}]^+$  in  $(\text{CD}_3)_2\text{CO}$ .

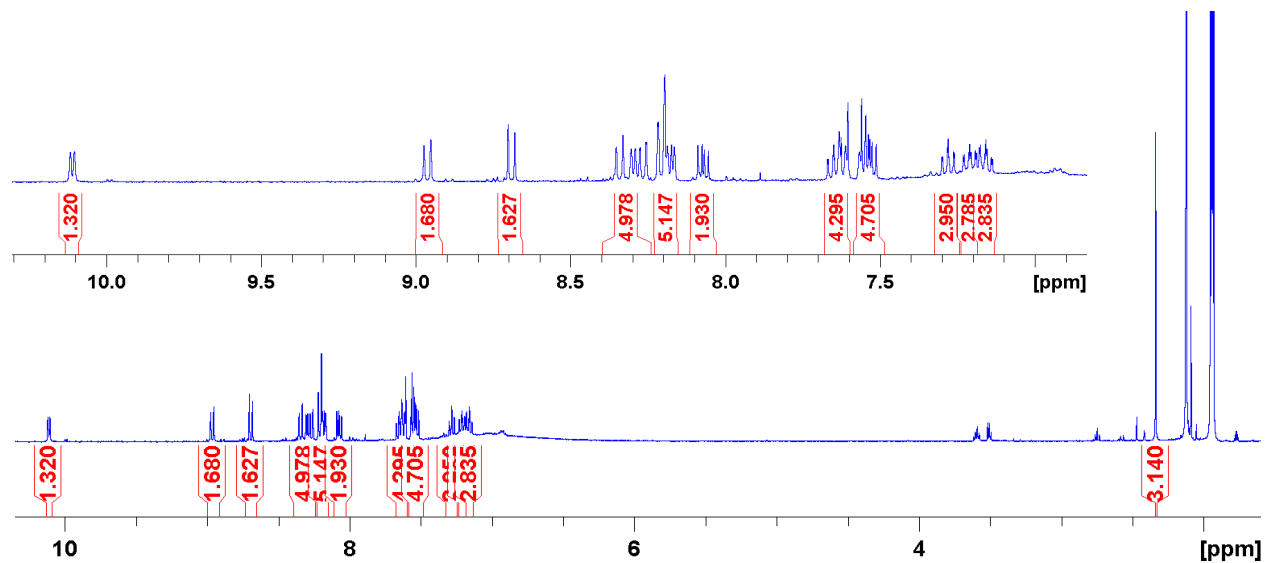

**Figure S8.**  $^1\text{H}$  NMR of **2a** in  $\text{CD}_3\text{CN}$ .

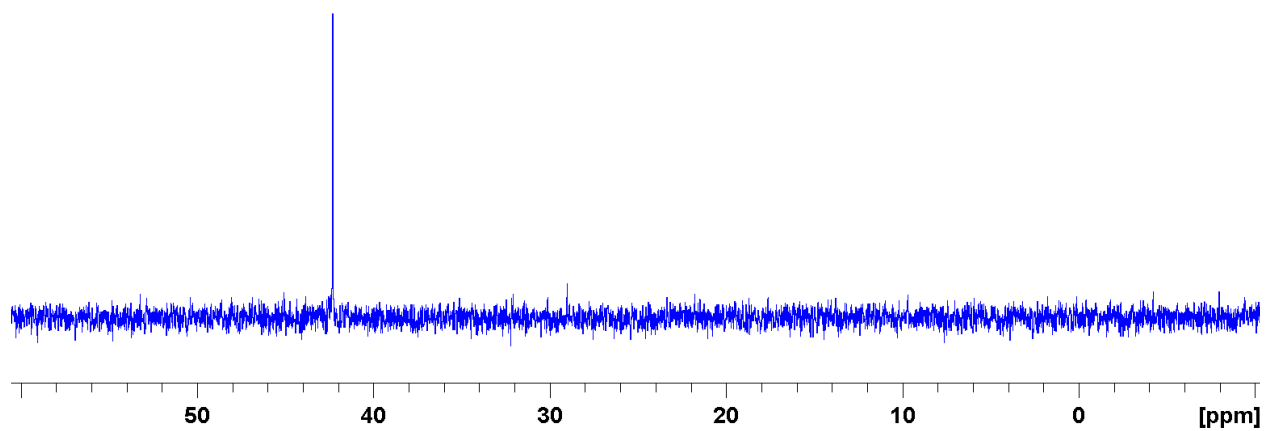

**Figure S9.**  $^{31}\text{P}\{\text{H}\}$  NMR of **2a** in  $\text{CD}_3\text{CN}$ .

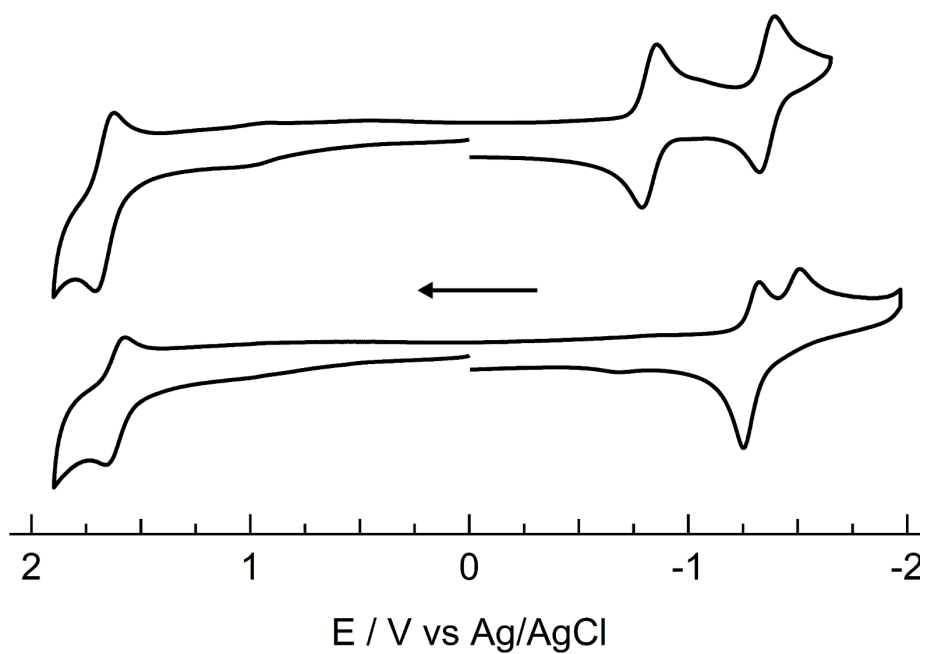

**Figure S10.** Circular Voltammograms of **1a** (top) and **2a** (bottom) in  $\text{CH}_3\text{CN}$  (0.1 M  $\text{TBAPF}_6$ ).

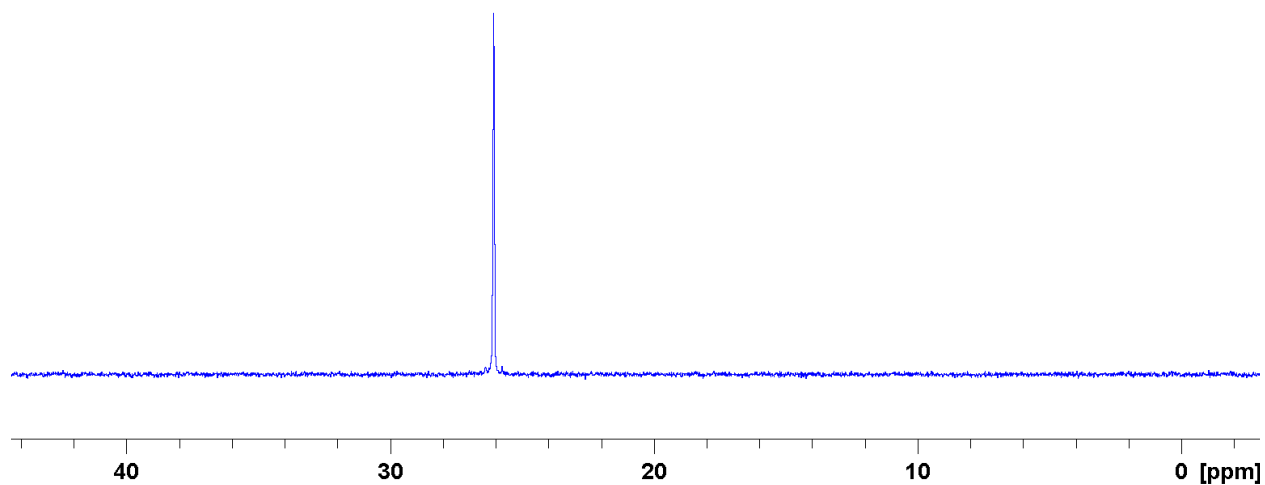

**Figure S11.**  $^{31}\text{P}\{^1\text{H}\}$  NMR of  $\text{OPPh}_3$  in  $\text{CD}_3\text{CN}$ .

### Identification of Photolysis Intermediate I.

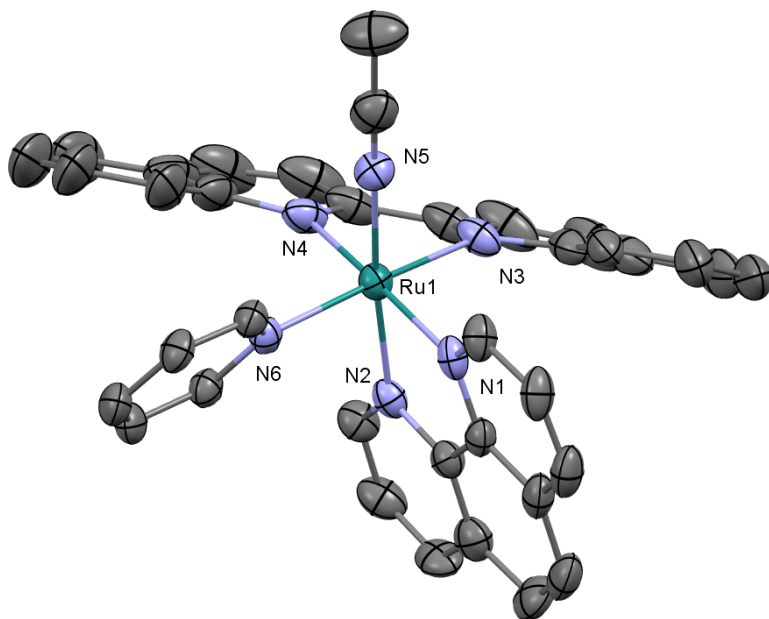

**Figure S12.** ORTEP plot of intermediate species  $[\text{Ru}(\text{biq})(\text{phen})(\text{py})(\text{CH}_3\text{CN})]^{2+}$  (**I**) (thermal ellipsoids have been drawn at 50% probability and hydrogen atoms,  $\text{PF}_6^-$  molecules, and co-



crystallized solvent molecules have been omitted for clarity); Ru: cyan, N: light purple, and C: grey.

**Table S1.** Crystallographic data for intermediate species **I**.

| <b>Complex</b>                                   | <b>[Ru(biq)(phen)(py)(CH<sub>3</sub>CN)]<sup>2+</sup> (<b>I</b>)</b>            |
|--------------------------------------------------|---------------------------------------------------------------------------------|
| Chemical formula                                 | RuC <sub>37</sub> H <sub>28</sub> F <sub>12</sub> N <sub>6</sub> P <sub>2</sub> |
| Formula weight                                   | 947.66                                                                          |
| Temp (K)                                         | 100(2)                                                                          |
| Crystal system                                   | Triclinic                                                                       |
| Space Group                                      | P-1                                                                             |
| <i>a</i> (Å)                                     | 10.7106(3)                                                                      |
| <i>b</i> (Å)                                     | 12.0600(3)                                                                      |
| <i>c</i> (Å)                                     | 17.6215(4)                                                                      |
| $\alpha$ (°)                                     | 109.847(1)                                                                      |
| $\beta$ (°)                                      | 92.875(1)                                                                       |
| $\gamma$ (°)                                     | 103.835(1)                                                                      |
| <i>V</i> (Å <sup>3</sup> )                       | 2057.24(9)                                                                      |
| <i>Z</i>                                         | 2                                                                               |
| <i>D</i> <sub>calc</sub> (Mg/m <sup>3</sup> )    | 1.530                                                                           |
| Absorption coefficient (mm <sup>-1</sup> )       | 4.629                                                                           |
| <i>F</i> (000)                                   | 948                                                                             |
| Crystal size (mm)                                | 0.25 x 0.137 x 0.072                                                            |
| Theta range for data collection (°)              | 2.694 to 74.926                                                                 |
| Index ranges                                     | -13 ≤ <i>h</i> ≤ 13<br>-15 ≤ <i>k</i> ≤ 15<br>-21 ≤ <i>l</i> ≤ 22               |
| Reflections collected                            | 54578                                                                           |
| Unique reflections                               | 8374<br>[ <i>R</i> (int) = 0.0318]                                              |
| Completeness to theta = 25.000°                  | 99.7%                                                                           |
| Data/restraints/parameters                       | 8374 / 526 / 699                                                                |
| <i>R</i> <sup>1</sup> (%) (all data)             | 0.0408 (0.0425)                                                                 |
| <i>wR</i> <sup>2</sup> (%) (all data)            | 0.1090 (0.1114)                                                                 |
| Goodness-of-fit on <i>F</i> <sup>2</sup>         | 1.052                                                                           |
| Largest diff. peak and hole (e Å <sup>-3</sup> ) | 0.870 and -0.390                                                                |

$$^a R1 = \frac{\sum ||F_o| - |F_c||}{\sum |F_o|} \times 100$$

$${}^b\text{wR2} = [\Sigma w (F_o^2 - F_c^2)^2 / \Sigma (w |F_o|^2)^2]^{1/2} \times 100$$

### Spectral Deconvolution and Kinetic Analysis.

Analysis of the photolysis data for **2a** in pyridine was performed under the assumption of a consecutive chemical reaction of the type  $A \rightarrow B \rightarrow C$ . The data supported this assumption through the appearance of two sets of isosbestic points. For the conversion of A to B, isosbestic points report directly on the formation of C and were observed at 316, 448, and 500 nm. By contrast, direct information on the disappearance of A was garnered from B to C isosbestic points at 338, 361, and 550 nm.

The concentration of A and C were calculated directly from a linear combination of individual specie absorbance, Abs, at a fixed wavelength,  $\lambda$ , Eq. S1.

$$Abs_{\lambda} = b(\epsilon_A^{\lambda}[A] + \epsilon_B^{\lambda}[B] + \epsilon_C^{\lambda}[C]) \quad (\text{S1})$$

And

$$[A] + [B] + [C] = [C_t] \quad (\text{S2})$$

Where  $\epsilon_i$  is the extinction coefficient of the  $i$ th species at  $\lambda$ ,  $b$  is the path length, and  $[A]$ ,  $[B]$ , and  $[C]$  are molar concentrations of each component and  $C_t$  is the total concentration, *e.g.* the concentration of A initially present in solution. At a B to C isosbestic point,

$$\epsilon_B^{\lambda} = \epsilon_C^{\lambda} = \epsilon_{BC}^{\lambda} \quad (\text{S3})$$

Which allows simplification of Equation S1 into terms of  $[A]$ ,

$$[A] = \frac{Abs_{\lambda} - \epsilon_{BC}^{\lambda}[C_t]}{\epsilon_A^{\lambda} - \epsilon_{BC}^{\lambda}} \quad (\text{S4})$$

provided the extinction coefficient of the product, C, is known. At  $t = 20$  min, it was assumed that the conversion of A to C was complete and  $\epsilon_C$  was calculated from the initial concentration of **2a** ( $\epsilon_{477} = 5,700 \text{ M}^{-1} \text{ cm}^{-1}$  in  $\text{CH}_3\text{CN}$ ,  $[\text{C}_t] = 38.7 \text{ } \mu\text{M}$ ) used in the experiment, Figure S13.

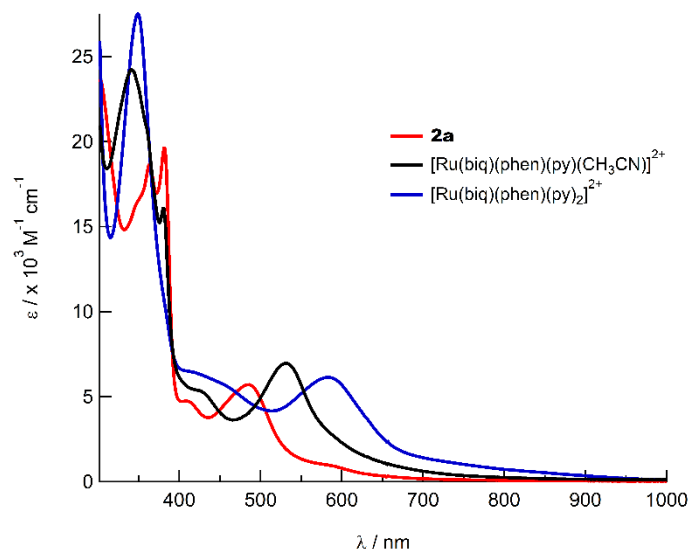

**Figure S13.** Extinction coefficient spectra of the three species observed during the photolysis of **2a** (red line) in pyridine to form  $[\text{Ru}(\text{biq})(\text{phen})(\text{py})(\text{CH}_3\text{CN})]^{2+}$  (black line), and  $[\text{Ru}(\text{biq})(\text{phen})(\text{py})_2]^{2+}$  (blue line).

The same approach was applied at the A to B isosbestic points which reports directly on the formation of C, except that

$$\epsilon_A^\lambda = \epsilon_B^\lambda = \epsilon_{AB}^\lambda \quad (\text{S5})$$

which results in the following expression

$$[\text{C}] = \frac{\text{Abs}_\lambda - \epsilon_{AB}^\lambda [\text{C}_t]}{\epsilon_C^\lambda - \epsilon_{AB}^\lambda} \quad (\text{S6})$$

for the concentration of C as a function of time. Relevant spectroscopic data for the isosbestic points used to determine [A] and [C] are given in Table S1. Once [A] and [C] were known, [B] B was calculated at each time point based from [C<sub>t</sub>].

**Table S2. Relevant Isosbestic Points, Reactions, and Extinction Coefficients Used In Spectral Deconvolution.**

| Isosbestic Point (nm) | Reaction | $\epsilon_C^\lambda$ (M <sup>-1</sup> cm <sup>-1</sup> ) | $\epsilon_{AB}^\lambda$ (M <sup>-1</sup> cm <sup>-1</sup> ) | $\epsilon_A^\lambda$ (M <sup>-1</sup> cm <sup>-1</sup> ) | $\epsilon_{BC}^\lambda$ (M <sup>-1</sup> cm <sup>-1</sup> ) |
|-----------------------|----------|----------------------------------------------------------|-------------------------------------------------------------|----------------------------------------------------------|-------------------------------------------------------------|
| 316                   | A to B   | 14,400                                                   | 18,900                                                      | -                                                        | -                                                           |
| 448                   | A to B   | 5,900                                                    | 4,100                                                       | -                                                        | -                                                           |
| 500                   | A to B   | 4,300                                                    | 4,900                                                       | -                                                        | -                                                           |
| 338                   | B to C   | -                                                        | -                                                           | 15,200                                                   | 24,000                                                      |
| 361                   | B to C   | -                                                        | -                                                           | 18,600                                                   | 21,200                                                      |
| 550                   | B to C   | -                                                        | -                                                           | 1,340                                                    | 5,200                                                       |

Note that the MLCT maxima for complex **2a** shifted to lower energy by ~10 nm ( $\lambda_{\max} = 485$  nm) when the solvent was changed from CH<sub>3</sub>CN to pyridine. However, the extinction coefficient was assumed to be constant between these two points and 100% conversion to Ru(biq)(phen)(py)<sub>2</sub> was assumed in order to calculate the corresponding extinction coefficient spectrum. Finally, the extinction coefficient of Ru(biq)(phen)(py)(CH<sub>3</sub>CN) was determined from Equation S7.

$$\epsilon_B = \frac{A_0 - \epsilon_A[A] - \epsilon_C[C]}{[B]} \quad (\text{S7})$$

Numerical solutions to Equation S7 were determined at each time point from  $t = 0.25$  to 10 min in order to collect an averaged, estimated extinction spectrum of Ru(biq)(phen)(py)(CH<sub>3</sub>CN) which is shown in Fig S13.

Mole fractions of each component,  $\chi_j$ , were calculated with Equation S8,

$$\chi_j = \frac{[j]}{[C_t]}, \quad j = [A], [B], [C] \quad (\text{S8})$$

which were used as the data points of Figure 6 in the main text.

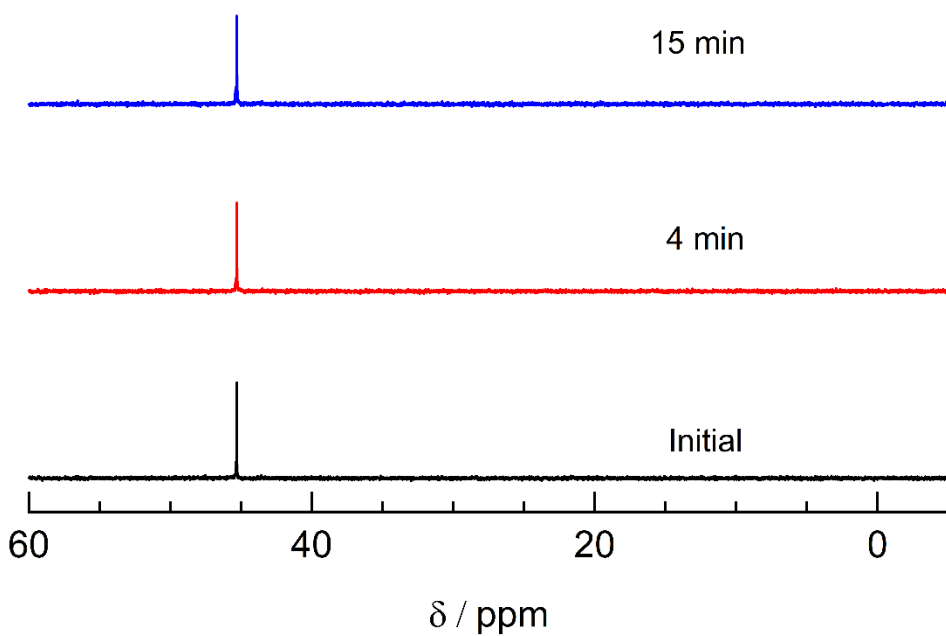

**Figure S14.**  $^{31}\text{P}\{\text{H}\}$  NMR of **1a** as a function of irradiation time in  $\text{CD}_3\text{CN}$  ( $\lambda_{\text{irr}} \geq 395$  nm).

**Table S3.** Crystallographic data for **1a**, **2a**, and **2b**.

| <b>Complex</b>                                   | <b>1a</b>                                                                       | <b>2a</b>                                                                       | <b>2b</b>                                                                       |
|--------------------------------------------------|---------------------------------------------------------------------------------|---------------------------------------------------------------------------------|---------------------------------------------------------------------------------|
| Chemical formula                                 | RuC <sub>51</sub> H <sub>42</sub> F <sub>12</sub> N <sub>5</sub> P <sub>3</sub> | RuC <sub>52</sub> H <sub>41</sub> N <sub>6</sub> F <sub>12</sub> P <sub>3</sub> | RuC <sub>34</sub> H <sub>26</sub> F <sub>12</sub> N <sub>6</sub> P <sub>2</sub> |
| Formula weight                                   | 1146.87                                                                         | 1171.89                                                                         | 909.62                                                                          |
| Temp (K)                                         | 100.0                                                                           | 150(2)                                                                          | 100.0                                                                           |
| Crystal system                                   | Monoclinic                                                                      | Triclinic                                                                       | Triclinic                                                                       |
| Space Group                                      | P 1 21/n 1                                                                      | P-1                                                                             | P-1                                                                             |
| <i>a</i> (Å)                                     | 17.6755(7)                                                                      | 12.2183(5)                                                                      | 10.2271(12)                                                                     |
| <i>b</i> (Å)                                     | 13.6841(5)                                                                      | 13.9009(6)                                                                      | 11.7137(12)                                                                     |
| <i>c</i> (Å)                                     | 21.4460(9)                                                                      | 15.8262(6)                                                                      | 14.9235(19)                                                                     |
| $\alpha$ (°)                                     | 90                                                                              | 101.454(2)                                                                      | 97.547                                                                          |
| $\beta$ (°)                                      | 111.9850(1)                                                                     | 103.216(2)                                                                      | 100.062                                                                         |
| $\gamma$ (°)                                     | 90                                                                              | 91.967(2)                                                                       | 97.284                                                                          |
| <i>V</i> (Å <sup>3</sup> )                       | 4810.0(3)                                                                       | 2555.73(18)                                                                     | 1724.4(3)                                                                       |
| <i>Z</i>                                         | 4                                                                               | 2                                                                               | 2                                                                               |
| <i>D</i> <sub>calc</sub> (Mg/m <sup>3</sup> )    | 1.584                                                                           | 1.523                                                                           | 1.752                                                                           |
| Absorption coefficient (mm <sup>-1</sup> )       | 0.515                                                                           | 0.487                                                                           | 0.650                                                                           |
| <i>F</i> (000)                                   | 2320                                                                            | 1184                                                                            | 908                                                                             |
| Crystal size (mm)                                | 0.279 x 0.223 x 0.148                                                           | 0.19 x 0.15 x 0.08                                                              | 0.253 x 0.216 x 0.054                                                           |
| Theta range for data collection (°)              | 2.851 to 26.396                                                                 | 3.001 to 28.298                                                                 | 2.804 to 26.411                                                                 |
| Index ranges                                     | -22 ≤ <i>h</i> ≤ 20<br>-17 ≤ <i>k</i> ≤ 17<br>-26 ≤ <i>l</i> ≤ 26               | -16 ≤ <i>h</i> ≤ 16<br>-18 ≤ <i>k</i> ≤ 18<br>-21 ≤ <i>l</i> ≤ 20               | -12 ≤ <i>h</i> ≤ 12<br>-14 ≤ <i>k</i> ≤ 14<br>-18 ≤ <i>l</i> ≤ 18               |
| Reflections collected                            | 47844                                                                           | 63494                                                                           | 48979                                                                           |
| Unique reflections                               | 9818<br>[ <i>R</i> (int) = 0.0510]                                              | 12678<br>[ <i>R</i> (int) = 0.0260]                                             | 7076<br>[ <i>R</i> (int) = 0.0291]                                              |
| Completeness to theta = 25.000°                  | 99.8%                                                                           | 99.7%                                                                           | 99.8%                                                                           |
| Data/restraints/parameters                       | 9818 / 563 / 899                                                                | 12678 / 253 / 768                                                               | 7076 / 86 / 528                                                                 |
| <i>R</i> 1 <sup>a</sup> (%) (all data)           | 3.81 (6.77)                                                                     | 2.97 (3.47)                                                                     | 2.72 (3.19)                                                                     |
| <i>wR</i> 2 <sup>b</sup> (%) (all data)          | 8.29 (9.88)                                                                     | 7.68 (8.04)                                                                     | 6.76 (7.07)                                                                     |
| Goodness-of-fit on <i>F</i> <sup>2</sup>         | 1.050                                                                           | 1.047                                                                           | 1.062                                                                           |
| Largest diff. peak and hole (e Å <sup>-3</sup> ) | 0.722 and -0.557                                                                | 0.649 and -0.478                                                                | 0.537 and -0.388                                                                |

$$^a R1 = \sum | |F_o| - |F_c| | / \sum |F_o| \times 100$$

$$^b wR2 = [\sum w ( F_o^2 - F_c^2 )^2 / \sum ( w |F_o|^2 )^2]^{1/2} \times 100$$

**Table S4.** Crystallographic and <sup>1</sup>GS calculated bond lengths and angles for **1a**, **2a**, and **2b**.

| <b>Bond angle (°)</b> | <b>1a</b>    |              | <b>2a</b>    |              | <b>2b</b>    |              |
|-----------------------|--------------|--------------|--------------|--------------|--------------|--------------|
|                       | <b>Expt.</b> | <b>Calc.</b> | <b>Expt.</b> | <b>Calc.</b> | <b>Expt.</b> | <b>Calc.</b> |
| N1-Ru1-N2             | 80.1(1)      | 79.48        | 79.60(6)     | 78.98        | 79.54(7)     | 78.95        |
| N1-Ru1-N3             | 87.7(2)      | 92.81        | 94.11(6)     | 93.57        | 100.22(7)    | 98.89        |
| N1-Ru1-N4             | 166.3(5)     | 168.45       | 169.52(6)    | 168.79       | 172.15(7)    | 171.95       |
| N1-Ru1-N5             | 94.6(1)      | 94.39        | 97.92(6)     | 96.32        | 94.34(7)     | 96.45        |
| N1-Ru1-P1/N6          | 93.68(8)     | 91.80        | 85.23(4)     | 86.80        | 82.24(7)     | 83.92        |
| N2-Ru1-N3             | 91.2(2)      | 88.87        | 81.96(6)     | 82.94        | 87.52(6)     | 86.24        |
| N2-Ru1-N4             | 93.4(5)      | 92.72        | 94.71(6)     | 95.39        | 92.81(7)     | 93.42        |
| N2-Ru1-N5             | 171.6(1)     | 172.04       | 174.21(6)    | 173.07       | 173.88(7)    | 175.02       |
| N2-Ru1-P1/N6          | 93.41(8)     | 95.38        | 89.61(4)     | 89.06        | 87.70(7)     | 87.86        |
| N3-Ru1-N4             | 80.3(5)      | 78.42        | 76.28(6)     | 76.01        | 77.54(7)     | 77.84        |
| N3-Ru1-N5             | 82.1(2)      | 86.35        | 93.05(6)     | 92.34        | 93.52(7)     | 92.62        |
| N3-Ru1-P1/N6          | 175.4(2)     | 174.23       | 171.51(4)    | 171.75       | 174.14(7)    | 172.85       |
| N4-Ru1-N5             | 90.3(5)      | 92.55        | 86.91(6)     | 88.35        | 93.30(7)     | 91.07        |
| N4-Ru1-P1/N6          | 98.8(4)      | 97.45        | 103.64(4)    | 102.91       | 99.31(7)     | 98.50        |
| N5-Ru1-P1/N6          | 93.43(8)     | 89.84        | 95.42(4)     | 95.81        | 91.59(7)     | 93.60        |

  

| <b>Torsion angle (°)</b> | <b>1a</b>    |              | <b>2a</b>    |              | <b>2b</b>    |              |
|--------------------------|--------------|--------------|--------------|--------------|--------------|--------------|
|                          | <b>Expt.</b> | <b>Calc.</b> | <b>Expt.</b> | <b>Calc.</b> | <b>Expt.</b> | <b>Calc.</b> |
| N1-C-C-N2                | 1.1(4)       | 0.96         | 2.1(2)       | 0.71         | 0.6(3)       | 0.89         |
| N3-C-C-N4                | 2(1)         | 0.65         | 10.5(2)      | 9.98         | 3.1(3)       | 3.09         |

  

| <b>Bond lengths (Å)</b> | <b>1a</b>    |              | <b>2a</b>    |              | <b>2b</b>    |              |
|-------------------------|--------------|--------------|--------------|--------------|--------------|--------------|
|                         | <b>Expt.</b> | <b>Calc.</b> | <b>Expt.</b> | <b>Calc.</b> | <b>Expt.</b> | <b>Calc.</b> |
| Ru1-N1                  | 2.066(3)     | 2.0817       | 2.072(2)     | 2.0827       | 2.084(2)     | 2.0960       |
| Ru1-N2                  | 2.056(2)     | 2.0798       | 2.077(2)     | 2.0962       | 2.075(2)     | 2.0917       |
| Ru1-N3                  | 2.106(9)     | 2.1361       | 2.148(1)     | 2.1695       | 2.073(2)     | 2.1048       |
| Ru1-N4                  | 2.06(1)      | 2.1082       | 2.112(2)     | 2.1330       | 2.084(2)     | 2.0991       |
| Ru1-N5                  | 2.030(2)     | 2.0076       | 2.036(2)     | 1.9998       | 2.046(2)     | 2.0099       |
| Ru1-P1/N6               | 2.343(1)     | 2.4105       | 2.3669(5)    | 2.4408       | 2.034(2)     | 2.0185       |

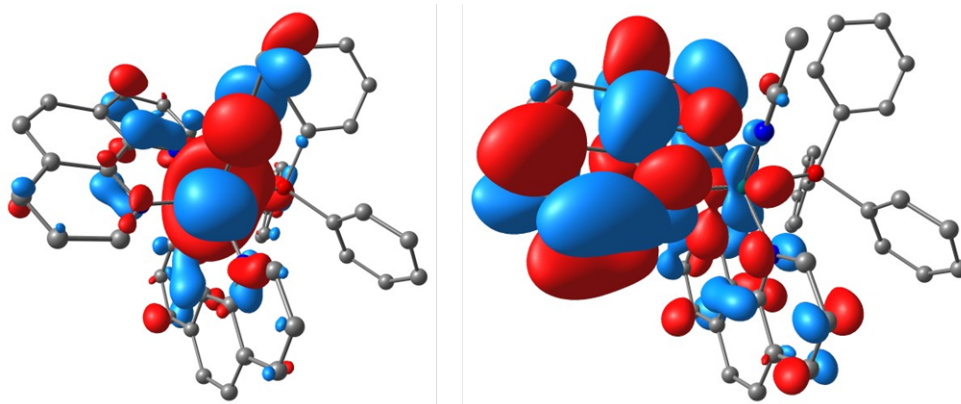

**Figure S15.** Electronic density plots of the calculated HOMO (left) and LUMO (right) of **1a** (drawn at isovalues of 0.02).

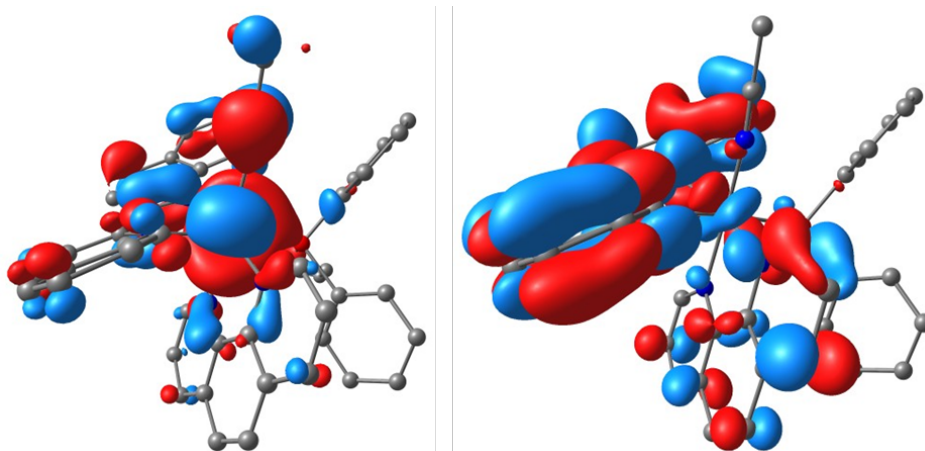

**Figure S16.** Electronic density plots of the calculated HOMO (left) and LUMO (right) of **2a** (drawn at isovalues of 0.02).

**Table S5.** Composition of Calculated HOMO and LUMO in **1a** and **2a**.

|                          | <b>1a</b> |      | <b>2a</b> |      |
|--------------------------|-----------|------|-----------|------|
|                          | HOMO      | LUMO | HOMO      | LUMO |
| Ru-d character (%)       | 77.3      | 2.60 | 71.2      | 3.25 |
| CH <sub>3</sub> CN (%)   | 7.97      | 0.21 | 7.98      | 0.44 |
| PPh <sub>3</sub> (%)     | 3.27      | 0.75 | 1.84      | 1.24 |
| phen (N1 and N2) (%)     | 5.62      | 10.4 | 4.30      | 11.0 |
| biq/phen (N3 and N4) (%) | 5.73      | 85.7 | 15.2      | 84.5 |



## EC<sub>50</sub> Curves

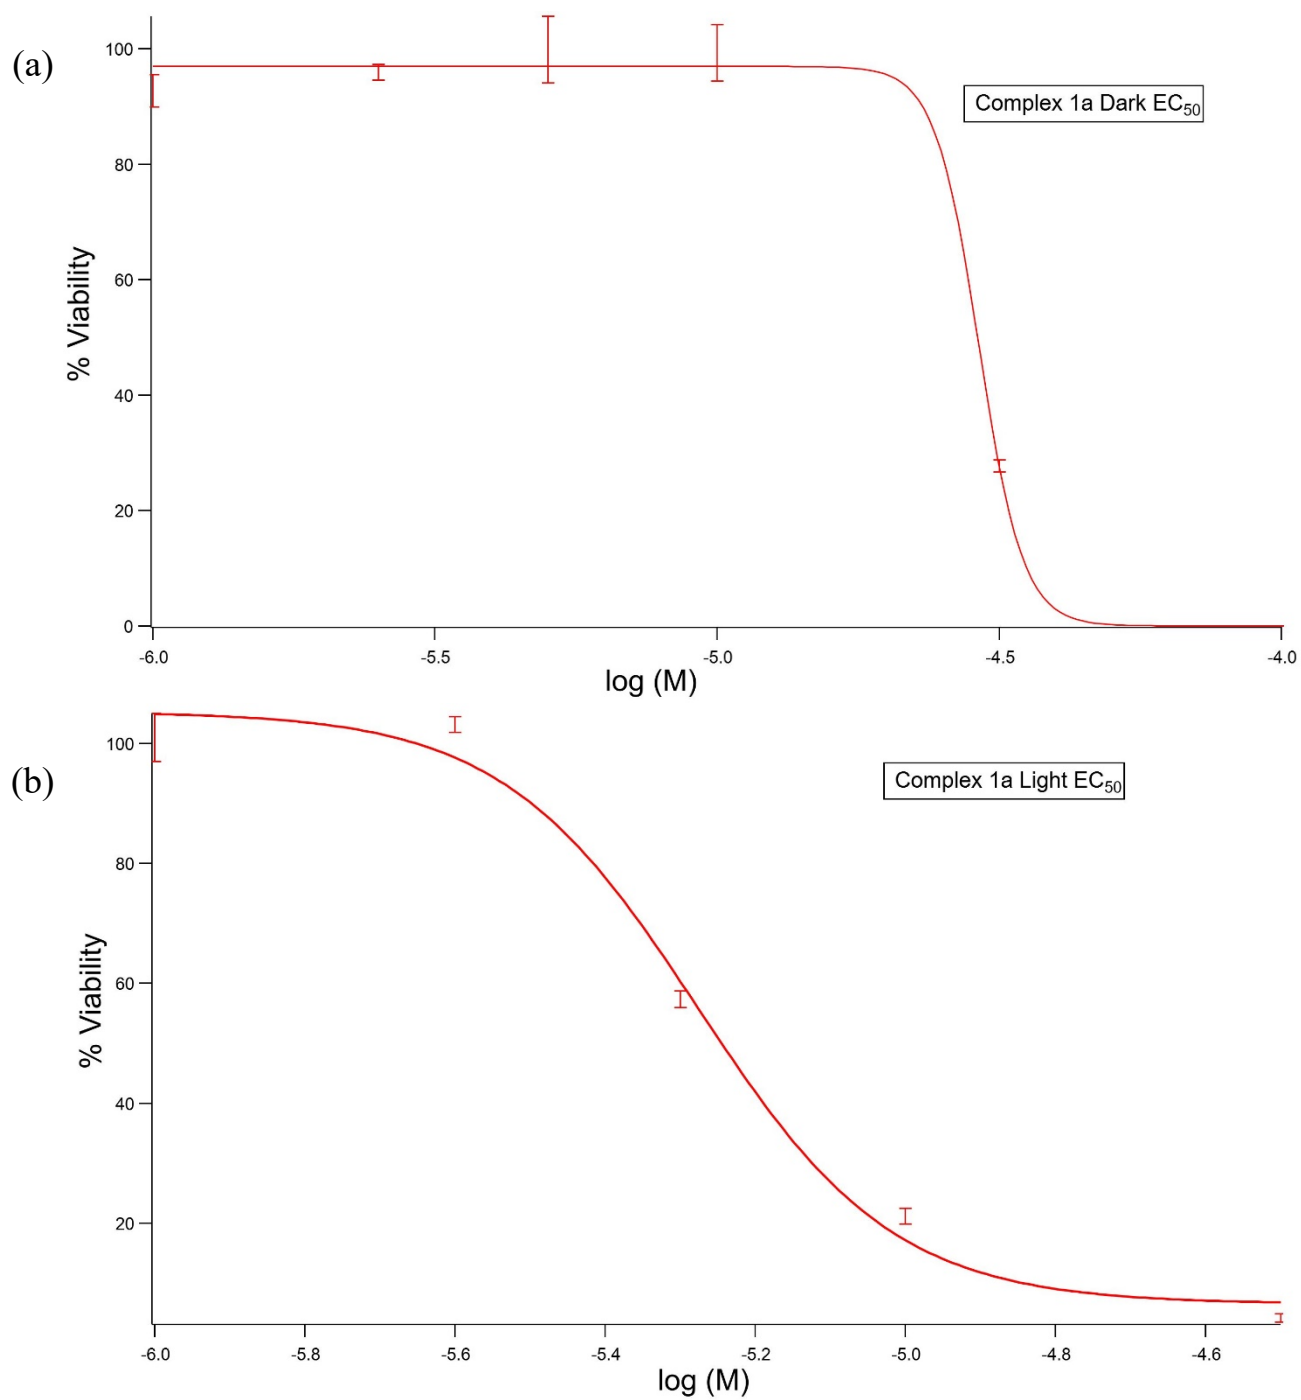

**Figure S17.** EC<sub>50</sub> curves of **1a** (a) kept in the dark and (b) upon irradiation ( $t_{\text{irr}} = 20$  min,  $\lambda_{\text{irr}} = 460\text{--}470$  nm,  $56$  J/cm). Data are representative of three different experiments.

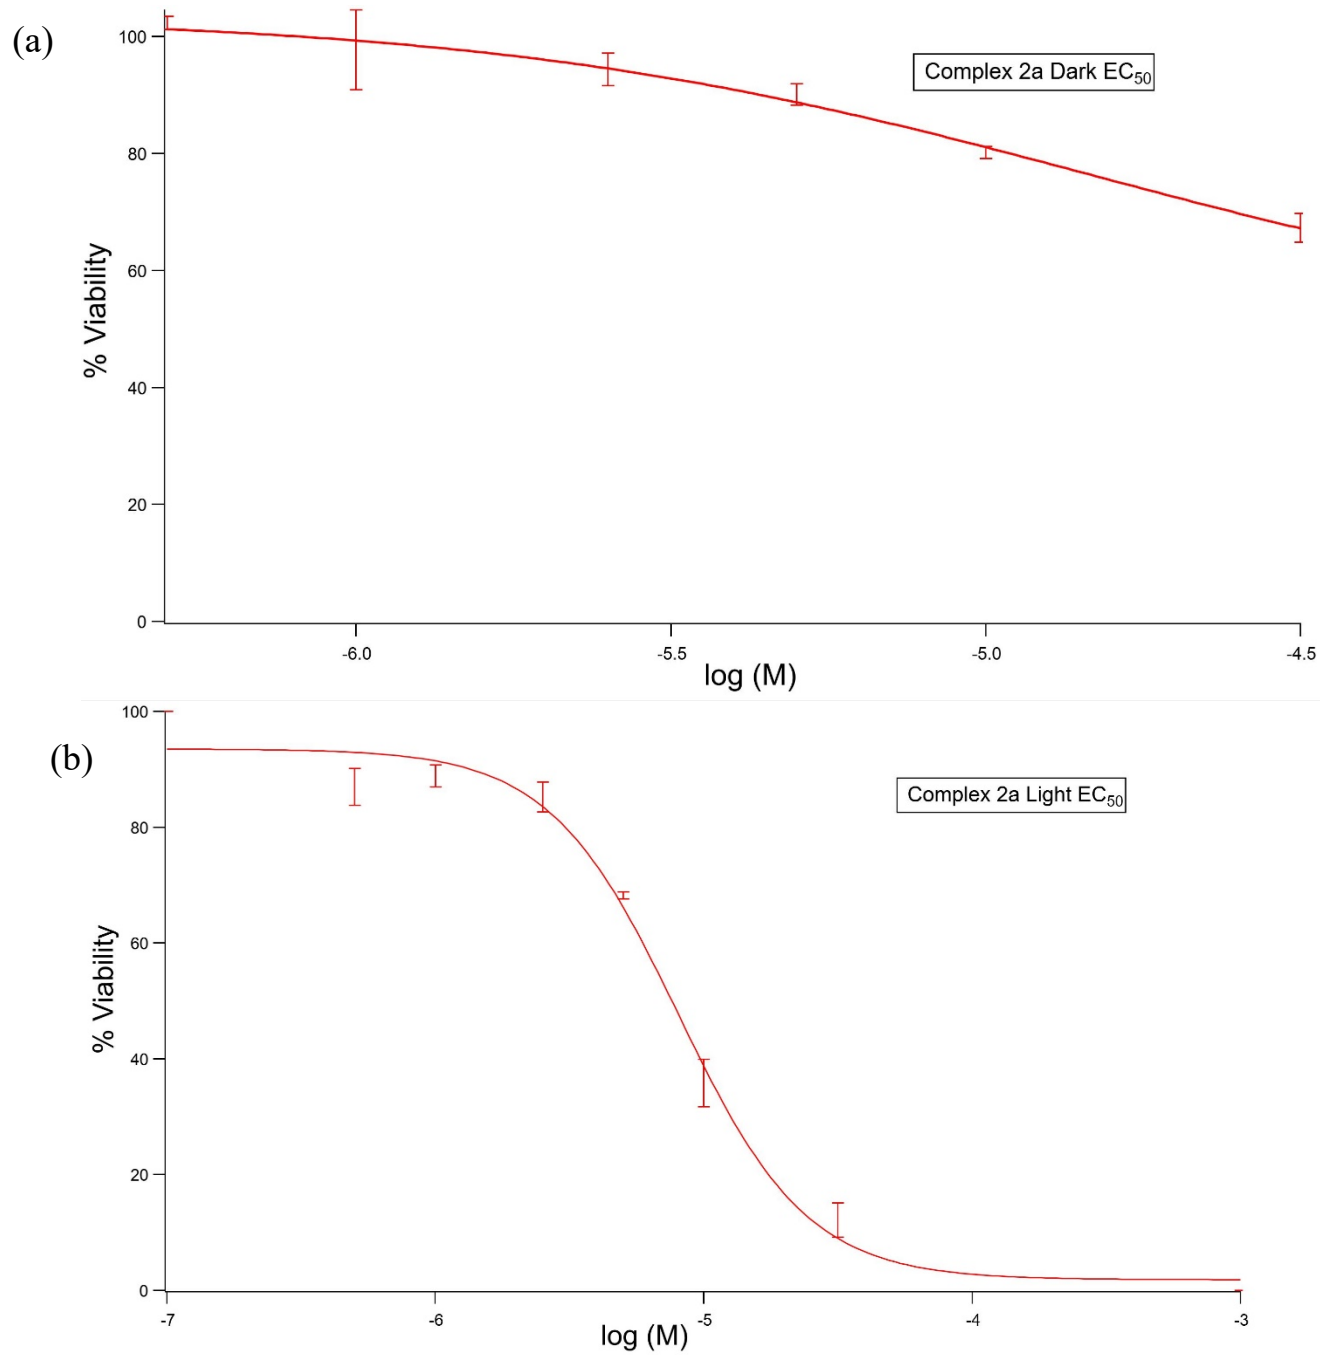

**Figure S18.** EC<sub>50</sub> curves of **2a** (a) kept in the dark and (b) upon irradiation ( $t_{\text{irr}} = 20$  min,  $\lambda_{\text{irr}} = 460\text{--}470$  nm,  $56$  J/cm). Data are representative of three different experiments.

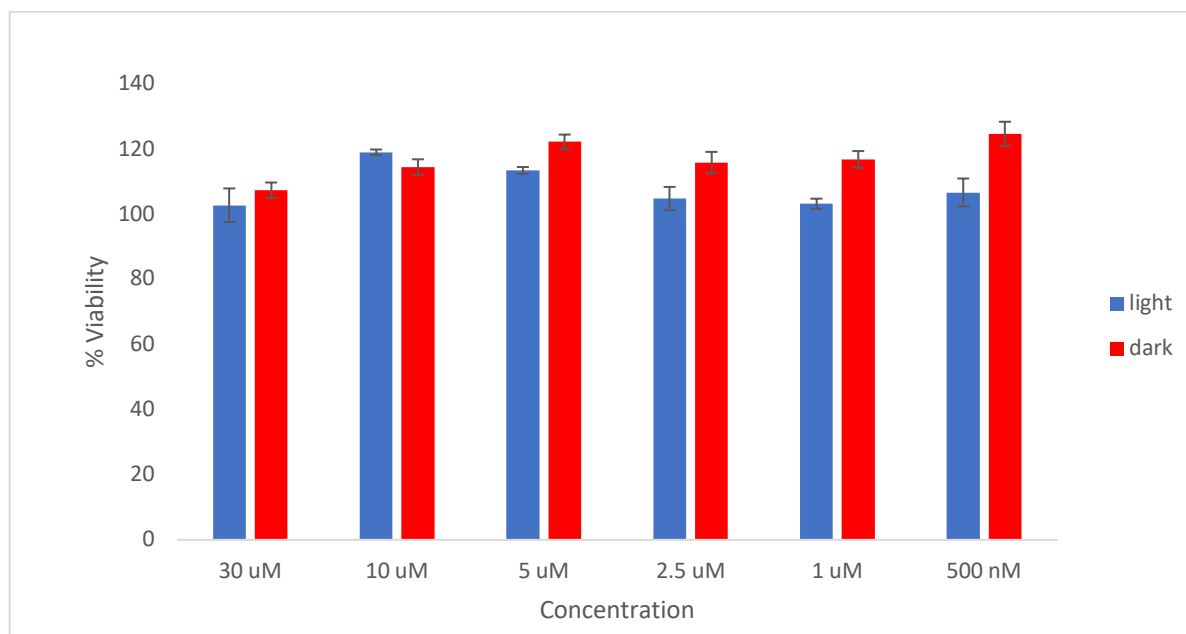

**Figure S19.** Viability of MDA-MB-231 cells when treated with DMEM supplemented with 10% FBS and 1,000 units/mL penicillin/streptomycin containing various concentrations of PPh<sub>3</sub> both in the dark and when irradiated with blue light ( $t_{\text{irr}} = 20$  min,  $\lambda_{\text{irr}} = 460\text{--}470$  nm,  $56$  J/cm<sup>2</sup>).
